# Supplementary material for: Unexpected genotypes associated with severe paediatric conditions identified in a healthy population cohort.
Source: Research Square preprint supplement (doi:10.21203/rs.3.rs-6532096/v1), 2025-05-15
Supplement: Supplementary file 1 [file 00720a3f226ad06d2b0d2599.xlsx]

## Sheet: Table 2_Genotype interpretation
Table 2. Variables impacting the validity of the genomic variants and phenotypic presentation.
Variant data
Sequencing artifact (low coverage 15x)
Incorrectly classified (novel LOFs)
Subject to clonal hematopoiesis
Potential pseudogene
Defining associated condition
Variability in symptoms
Severity
Penetrance
Age of onset
Inheritance pattern
Patient characteristics
Younger than expected age of onset
Gender (some conditions are gender specific)
Receiving medication/treatment
Electronic medical record data
Incomplete
Not accurate
