# Supplementary material for: Unexpected genotypes associated with severe paediatric conditions identified in a healthy population cohort.
Source: Research Square preprint supplement (doi:10.21203/rs.3.rs-6532096/v1), 2025-05-15
Supplement: Supplementary file 2 [file 4c88d5d133afdbe9e4452a31.xlsx]

## Sheet: Sub Table 4_ Severe Variants  
Supplementary Table 4: P/LP variants associated with and severe paediatric genetic conditions.
Inheritance	Variant phentoype	Gene	cDNA change	Protein change	Condition (OMIM #)	ACMG Classifcation	ACMG criteria	Participant age/ age (years) at recruitment, sex and ancestry	Medical history available	Medical history details
Autosomal dominant heterozygotes	Highly penetrant severe paediatric	ATP1A3	NM_152296.5:c.1072G>C	NP_689509.1:p.Gly358Arg	CAPOS syndrome (601338), Alternating hemiplegia of childhood 2 (614820), Dystonia-12 (128235)	LP	PM2 + PM5_str + PM1 = 1 + 4 + 2 = 7	12y Male Malay	yes	Asymptomatic
Autosomal dominant heterozygotes	Highly penetrant severe paediatric	COL2A1	NM_001844.5:c.85+1G>A	.	Stickler syndrome (108300)	LP	PM2 + PVS1 = 1 + 8 = 9	54y Female Chinese	no	NA
Autosomal dominant heterozygotes	Highly penetrant severe paediatric	FZD4	NM_012193.4:c.678G>A	NP_036325.2:p.Trp226Ter	Exudative vitreoretinopathy 1, (133780); Retinopathy of prematurity (133780)	P	PM2 + PVS1 + PM1 = 1 + 8 + 2 = 11	27y Male Malay	no	NA
Autosomal dominant heterozygotes	Highly penetrant severe paediatric	KMT2A	NM_001197104.2:c.1470_1471del	NP_001184033.1:p.Gln491GlyfsTer3	Wiedemann-Steiner syndrome (605130)	LP	PM2 + PVS1 = 1 + 8 = 9	55y Male Chinese, (170 cm	yes	Asymptomatic
Autosomal dominant heterozygotes	Highly penetrant severe paediatric	SPAST	NM_014946.3:c.1496G>A	NP_055761.2:p.Arg499His	Spastic paraplegia 4 (182601)	LP	PS4_str + PM5 + PM1 = 4 + 2 + 2 = 8	35y Female Chinese	no	NA
Autosomal recessive homozygotes	Highly penetrant severe paediatric	GLRB	NM_000824.5:c.148C>T	NP_000815.1:p.Arg50Ter	Hereditary hyperekplexia 2 (614619)	LP	PM2 + PVS1 = 1 + 8 = 9	36y Female Chinese	no	NA
Autosomal recessive homozygotes	Highly penetrant severe paediatric	LAMA2	NM_000426.3:c.1084A>T	NP_000417.2:p.Arg362Ter	Congenital muscular dystrophy (607855), Muscular dystrophy, limb-girdle (618138)	LP	PM2 + PVS1 = 1 + 8 = 9	30y Female Malay	no	NA
Autosomal recessive homozygotes	Highly penetrant severe paediatric	SLC26A4	NM_000441.2:c.919-2A>G	.	Autosomal recessive deafness (600791), Pendred syndrome (274600)	P	PVS1 + PP1 + PM3 = 8 + 1 + 2 = 11 (ClinGen Hearing Loss Expert Panel Curated)	40y Male Chinese	yes	Asymptomatic
Autosomal recessive homozygotes	Highly penetrant severe paediatric	TUBGCP6	NM_020461.4:c.2665_2666insA	NP_065194.3:p.Pro889HisfsTer4	Autosomal recessive microcephaly and chorioretinopathy (251270)	LP	PM2 + PVS1 = 1 + 8 = 9	62y Male Chinese, 167cm	no	NA
