# Supplementary material for: Unexpected genotypes associated with severe paediatric conditions identified in a healthy population cohort.
Source: Research Square preprint supplement (doi:10.21203/rs.3.rs-6532096/v1), 2025-05-15
Supplement: Supplementary file 3 [file 885d604418e3a99da8586830.xlsx]

## Sheet: Table 1_ Cohort Demographics
Table 1. Demographic summary for 9,637 unrelated participants included for variant analysis.
Characteristics	All		Chinese		Indian		Malay		Other
	n	(%)	n	(%)	n	(%)	n	(%)	n	(%)
No. individuals	9637		6044	0.627166	1957	0.203071	1619	0.167998	17	0.00176403
Sex
Female	5514	0.57217	3467	0.573627	1116	0.570261	920	0.568252	11	0.647059
Male	4123	0.42783	2577	0.426373	841	0.429739	699	0.431748	6	0.352941
Age range (year)	6 - 88		6 - 88		6 - 83		6 - 85		24 - 60
Age median (year)	47		49		45		43		35
