# Supplementary material for: Unexpected genotypes associated with severe paediatric conditions identified in a healthy population cohort.
Source: Research Square preprint supplement (doi:10.21203/rs.3.rs-6532096/v1), 2025-05-15
Supplement: Supplementary file 4 [file 8b30a6caafbf963b4d62ad4c.xlsx]

## Sheet: Sub Table 3_Excluded variants 
Supplementary Table 3: P/LP variants detected in severe peadiatric genes excluded for analysis.
Autosomal dominant heterozygotes
Gene	Variant	Heterozygotes (n)	Condition (Phenotype MIM number)	Reason for exclusion
CLCN1	NM_000083.3:c.157del p.Arg53AlafsTer24	1	Autosomal recessive myotonia congenita (255700)	AR inheritance
CSF1R	NM_001288705.3:c.272_279del p.Leu91GlnfsTer137	1	Brain abnormalities, neurodegeneration, and dysosteosclerosis (618476)	AR inheritance
MAT1A	NM_000429.3:c.1070C>T p.Pro357Leu	2	Methionine adenosyltransferase deficiency (250850)	AR inheritance
MAT1A	NM_000429.3:c.529C>T p.Arg177Trp	1	Methionine adenosyltransferase deficiency (250850)	AR inheritance
MAT1A	NM_000429.3:c.895C>T p.Arg299Cys	1	Methionine adenosyltransferase deficiency (250850)	AR inheritance
SEC23B	NM_006363.6:c.1468_1475del p.Ser490ProfsTer28	1	Autosomal recessive congenital dyserythropoietic anemia type II (224100)	AR inheritance
SEC23B	NM_006363.6:c.1648C>T p.Arg550Ter	2	Autosomal recessive congenital dyserythropoietic anemia type II (224100)	AR inheritance
SEC23B	NM_006363.6:c.1660del p.Arg554AspfsTer33	2	Autosomal recessive congenital dyserythropoietic anemia type II (224100)	AR inheritance
SEC23B	NM_006363.6:c.232del p.Tyr78IlefsTer27	1	Autosomal recessive congenital dyserythropoietic anemia type II (224100)	AR inheritance
SEC23B	NM_006363.6:c.235C>T p.Arg79Ter	1	Autosomal recessive congenital dyserythropoietic anemia type II (224100)	AR inheritance
SEC23B	NM_006363.6:c.40C>T p.Arg14Trp	1	Autosomal recessive congenital dyserythropoietic anemia type II (224100)	AR inheritance
SEC23B	NM_006363.6:c.748C>T p.Gln250Ter	1	Autosomal recessive congenital dyserythropoietic anemia type II (224100)	AR inheritance
SLC3A1	NM_000341.4:c.1045del p.Asp349ThrfsTer46	3	Autosomal recessive/dominant cystinuria (220100)	AR inheritance
SLC3A1	NM_000341.4:c.1113C>A p.Tyr371Ter	2	Autosomal recessive/dominant cystinuria (220100)	AR inheritance
SLC3A1	NM_000341.4:c.1158T>A p.Tyr386Ter	3	Autosomal recessive/dominant cystinuria (220100)	AR inheritance
SLC3A1	NM_000341.4:c.1332+2T>A	2	Autosomal recessive/dominant cystinuria (220100)	AR inheritance
SLC3A1	NM_000341.4:c.1354C>T p.Arg452Trp	2	Autosomal recessive/dominant cystinuria (220100)	AR inheritance
SLC3A1	NM_000341.4:c.1365del p.Arg456ValfsTer9	1	Autosomal recessive/dominant cystinuria (220100)	AR inheritance
SLC3A1	NM_000341.4:c.1400T>A p.Met467Lys	1	Autosomal recessive/dominant cystinuria (220100)	AR inheritance
SLC3A1	NM_000341.4:c.647C>T p.Thr216Met	1	Autosomal recessive/dominant cystinuria (220100)	AR inheritance
SLC3A1	NM_000341.4:c.808C>T p.Arg270Ter	1	Autosomal recessive/dominant cystinuria (220100)	AR inheritance
WFS1	NM_006005.3:c.1999C>T p.Gln667Ter	8	Autosomal recessive Wolfram syndrome (222300)	AR inheritance
Autosomal recessive homozygotes
Gene	Variant	Homozyogotes (n)	Condition (Phenotype MIM number)	Reason for exclusion
AMT	NM_000481.4:c.230C>T p.Ser77Leu	1	Nonketotic hyperglycinemia (620398)	Sequencing ambiguity
BTD	NM_001370658.1:c.1270G>C p.Asp424His	1	Biotinidase deficiency (253260)	Hypomorphic
CHD7	NM_017780.4:c.2640_2641del p.Asp880GlufsTer5	2	CHARGE Syndrome/Kallmann syndrome (214800)	Sequencing ambiguity
EHMT1	NM_024757.5:c.827_833del p.Cys276PhefsTer4	1	Kleefstra syndrome (610253)	Sequencing ambiguity
EP300	NM_001429.4:c.1626_1627insTTTTTTTT p.Met543PhefsTer4	1	Rubinstein-Taybi syndrome (613684)	Sequencing ambiguity
LMX1B	NM_001174147.2:c.653_654insCCGGATGAGATCTCCCTCTGCACGGCGGCGGCGGCTCCAGGGTGCACACGTTTCAGTGGCTACGGCTTGTGGACATCGATCGCACCGAGAGCCTAACCCCCGGTGT p.Arg218SerfsTer73	1	Nail-patella syndrome (161200)	Sequencing ambiguity
ASXL1	NM_015338.6:c.1294C>T p.Gln432Ter	1	Bohring-Opitz syndrome, Myelodysplastic syndrome (605039)	Clonal hamatopoiesis
ASXL1	NM_015338.6:c.1926_1930del p.Gly644TrpfsTer12	1	Bohring-Opitz syndrome, Myelodysplastic syndrome (605039)	Clonal hamatopoiesis
ASXL1	NM_015338.6:c.1932_1933insT p.Gly645TrpfsTer13	1	Bohring-Opitz syndrome, Myelodysplastic syndrome (605039)	Clonal hamatopoiesis
ASXL1	NM_015338.6:c.2407C>T p.Gln803Ter	1	Bohring-Opitz syndrome, Myelodysplastic syndrome (605039)	Clonal hamatopoiesis
ASXL1	NM_015338.6:c.4232G>A p.Trp1411Ter	1	Bohring-Opitz syndrome, Myelodysplastic syndrome (605039)	Clonal hamatopoiesis
CBL	NM_005188.4:c.328G>T	1	Noonan syndrome-like disorder with or without juvenile myelomonocytic leukemia (613563)	Clonal hamatopoiesis
FBN2	NM_001999.4:c.2118C>A p.Cys706Ter	1	Contractural arachnodactyly, congenital, (121050)	Hapolosufficient
MAP2K1	NM_002755.4:c.139C>T p.Arg47Ter	1	Cardiofaciocutaneous syndrome (615279)	Hapolosufficient
SMC3	NM_005445.4:c.1409+1G>C	1	Cornelia de Lange syndrome (610759)	Hapolosufficient
SMC3	NM_005445.4:c.394C>T p.Arg132Ter	1	Cornelia de Lange syndrome (610759)	Hapolosufficient
TMEM67	NM_153704.6:c.2241+5_2241+20dup	1	Joubert syndrome (610688)	Hapolosufficient
CYP21A2	NM_000500.9:c.293-13C>G	1	Congenital adrenal hyperplasia due to 21-hydroxylase deficiency (201910)	Pseudogene
Xlinked inheritance
Gene	Variant	Heterozygotes (n)	Condition (Phenotype MIM number)	Reason for exclusion
ABCB7	NM_001271696.3:c.1831+2T>A	1	Anemia, sideroblastic, with ataxia, (301310)	XLR - female
ABCD1	NM_000033.4:c.1252C>T	1	Adrenoleukodystrophy (300100)	XLR - female
ALG13	NM_001099922.3:c.461dup p.Thr155AsnfsTer17	1	Congenital disorder of glycosylation,type Is; Developmental and epileptic encephalopathy 36	XLR - female
AR	NM_000044.6:c.241_242insCAGCAGCAAA p.Glu81AlafsTer6	1	Androgen insensitivity (300068)	Clonal hamatopoiesis
ARX	NM_139058.3:c.590del p.Gly197AlafsTer128	2	Epileptic encephalopathy, early infantile (300884)	XLR - female
BTK	NM_000061.3:c.1581_1584del p.Cys527TrpfsTer2	1	Isolated growth hormone deficiency, type III, with agammaglobulinemia (307200)	XLR - female
CFP	NM_001145252.3:c.778_784dup p.Pro262LeufsTer97	1	Properdin deficiency (312060)	XLR - female
CLCN5	NM_001127898.4:c.151C>T p.Arg51Ter	1	Proteinuria (308990)	XLR - female
CUL4B	NM_001079872.2:c.1257-2A>T	1	Mental retardation (Cabezas type) (300354)	XLR - female
DMD	NM_004006.2:c.3603+2T>A	2	Duchenne muscular dystrophy (310200)	XLR - female
GPC3	NM_004484.4:c.67C>T p.Gln23Ter	1	Simpson-Golabi-Behmel syndrome (312870)	XLR - female
GPC4	NM_001448.3:c.1051C>T p.Arg351Ter	2	Keipert syndrome (301026)	XLR - female
HCFC1	NM_005334.3:c.4239_4240insGCGCC p.Gln1414AlafsTer29	1	Mental retardation (309541)	XLR - female
HUWE1	NM_031407.7:c.5075C>A	1	Mental retardation (309590)	XLR - female
HUWE1	NM_031407.7:c.5161+2T>C	1	Mental retardation (309590)	XLR - female
HUWE1	NM_031407.7:c.817C>T	1	Mental retardation (309590)	XLR - female
MAOA	NM_000240.3:c.1107-2A>T	2	Brunner syndrome (300615)	XLR - female
NHS	NM_001291867.2:c.2809_2810insTACT p.Asp937ValfsTer3	1	Nance-Horan syndrome (302350)	XLR - female
NR0B1	NM_000475.5:c.579_580insTG p.Ala194TrpfsTer71	4	Adrenal hypoplasia, congenital, (300200)	XLR - female
NYX	NM_022567.2:c.85_108del p.Arg29_Ala36del	1	Night blindness (310500)	XLR - female
OFD1	NM_003611.3:c.710del p.Lys237SerfsTer6	2	Simpson-Golabi-Behmel syndrome (300209)	XLR - female
OPN1LW	NM_020061.6:c.396del p.Val133SerfsTer30	1	Blue cone monochromacy (303700)	XLR - female
PQBP1	NM_001032382.1:c.461_462del p.Glu154AlafsTer12	1	Renpenning syndrome (309500)	XLR - female
SLC9A6	NM_001042537.1:c.1042-1C>T	1	Christianson syndrome (300243)	XLR - female
THOC2	NM_001081550.2:c.2758-2_2758-1insAACTTAAAGTCCAGATGAAAGCAATTGATGACAATCAGGAAAT	1	Mental retardation (300957)	XLR - female
UPF3B	NM_080632.3:c.263+1_263+2del	1	Mental retardation (300676)	XLR - female
