# Supplementary material for: Unexpected genotypes associated with severe paediatric conditions identified in a healthy population cohort.
Source: Research Square preprint supplement (doi:10.21203/rs.3.rs-6532096/v1), 2025-05-15
Supplement: Supplementary file 5 [file 96ba0ba86bb2eeae8c4bd1bd.xlsx]

## Sheet: Sup Table 1_Study cohort 
Supplementary Table 1: Overview of the participating studies comprising the SG10K_Health project and NHCS Biobank.
Study cohort	Cohort Code	Study Name	Sample size a	Study IRB	Clinical trials identifier	Inclusion criteria	Exclusion criteria
SG10K Health Project	GUSTO	Growing Up in Singapore Towards healthy Outcomes birth cohort study1	962 children	National University Hospital, Singapore CIRB/E/2019/2655	NCT01174875	0-10yrs	Pregnant women w IVF pregnancies, multiple miscarriages, T1D, chemo or psychotrophic drugs
	HELIOS	Health for Life In Singapore Study2	1985 adults	Nanyang Technology University, IRB 2016-11-030	NA	30-84yrs	Pregnant, breast feeding, acute illness, recent surgery, unable to give informed consent. Excluded after comprehensive health screen.
	MEC	Singapore Multi-Ethnic Cohort Study3	2611 adults	National University of Singapore, CIRB 13-512	NA	21-75yrs	History of heart dx, stroke, cancer, renal failure
	PRISM	SingHealth Duke-NUS Institute of Precision Medicine4	1207 adults	SingHealth Centralised Institutional Review Board , 2013/605/C	NCT02791152	21–69 yrs	CAD, stroke, myocardial infarction, anti-hypertensive agents, cancer hx, T1D, autoimmune, endocrine or genetic dx, psychiatric illness, asthma, chronic infection, acute illness, 1st degree fhx of cardiac conditions. Excluded for any medical conditions after comprehensive health screen.
	SEED	Singapore Epidemiology of Eye Diseases study5	1374 adults	SingHealth Centralised Institutional Review Board, 2018/2717, 2018/2921, 2012/487/A, 2015/2279, 2018/2006, 2018/2594, 2018/2570	NA	40-79yrs	Severe cognitive impairment, mobility or psychiatric illness
	TTSH	Tan Tock Seng Hospital6	912 adults	National Health Group, TB-2020-001 & BTC-2020-001	NA	21yrs	No hx of stroke, cardiovascular dx, cancer, diabetes, renal failure.
National Heart Centre Singapore Biobank	NHCS Biobank	National Heart Centre Singapore Biobank7	586 adults	SingHealth Centralised Institutional Review Board 2013/605/C	NCT02791152	18–75 yrs	Acute or chronic illness, history of cancer, cardiovascular disease, diabetes, autoimmune, endocrine or genetic disease, psychiatric illness, diabetes. Excluded for any medical conditions after comprehensive health screen.
a Refers tonumber of participants unrelated to the second degree.
1. Soh, S.-E. et al. Cohort profile: Growing Up in Singapore Towards healthy Outcomes (GUSTO) birth cohort study. Int. J. Epidemiol. 43, 1401–1409 (2014).
2. https://www.healthforlife.sg/
3. Tan, K. H. X. et al. Cohort Profile: The Singapore Multi-Ethnic Cohort (MEC) study. Int. J. Epidemiol. 47, 699–699j (2018).
4. Bylstra, Y. et al. Implementation of genomics in medical practice to deliver precision medicine for an Asian population. npj Genomic Med. 4, 1–7 (2019).
5. Majithia, S. et al. Cohort Profile: The Singapore Epidemiology of Eye Diseases study (SEED). Int. J. Epidemiol. 50, 41–52 (2021).
6. https://www.ttsh.com.sg/Patients-and-Visitors/Medical-Services/personalised-medicine/Pages/default.aspx
7. Yap, J. et al. Harnessing technology and molecular analysis to understand the development of cardiovascular diseases in Asia: a prospective cohort study (SingHEART). BMC Cardiovascular Disorders 19 (2019): 1-7.
