# Supplementary material for: Unexpected genotypes associated with severe paediatric conditions identified in a healthy population cohort.
Source: Research Square preprint supplement (doi:10.21203/rs.3.rs-6532096/v1), 2025-05-15
Supplement: Supplementary file 6 [file 9c224290a0e53a4962c0cead.xlsx]

## Sheet: Table 4_ Variants Detected
Table 4. Participants with P/LP variants in genes associated with severe paediatric disease. In bold are variants associated with highly penetrant severe paediatric genetic conditions.
Autosomal recessive homozygotes
Gene	Variant	Homozyogotes (n)	Homozgyotes in gnomAD4.0	Condition (Phenotype MIM number)	Expected phenotype	Evidence for variant impact	Medical history available (n)	Relevant medical history (n)
ABCA4	NM_000350.3:c.5882G>A; p.Gly1961Glu	1	41	Retinitis pigmentosa (601718), Stargardt disease/ Fundus flavimaculatus (248200), Cone-rod dystrophy (604116)	Variable penetrance	PMID: 23769331	0	NA
CFTR	NM_000492.4:c.4056G>C p.Gln1352His	8	13	Congenital bilateral absence of vas deferens (277180), Hereditary pancreatitis (167800)	Variable penetrance	PMID: 36604502; PMID: 32777524. Associated with congenital bilateral absence of vas deferens.	2	1
	NM_000492.4:c.1210-11T>G	2	27	Cystic fibrosis (219700), Congenital bilateral absence of vas deferens (277180), Hereditary pancreatitis (167800)	Variable penetrance	PMID: 34196078	0	NA
	NM_000492.4:c.1865G>A p.Gly622Asp	1	2	Cystic fibrosis (219700), Congenital bilateral absence of vas deferens (277180), Hereditary pancreatitis (167800)	Variable penetrance	PMID: 25443471; PMID: 29805046	0	NA
GALC	NM_000153.4:c.2041G>A p.Val681Met	1	2	Krabbe disease (245200)	Adult onset	PMID: 23462331; PMID: 24252386	0	NA
GJB2	NM_004004.6:c.109G>A p.Val37Ile	79	76	Autosomal recessive deafness (220290)	Variable penetrance	PMID: 26061099	35	0
GLRB	NM_000824.5:c.148C>T p.Arg50Ter	1	0	Hereditary hyperekplexia 2 (614619)	Highly penetrant	PMID: 23184146	0	NA
HBB	NM_000518.5:c.79G>A p.Glu27Lys	2	5	Beta-thalassemia (613985)	Mild	PPMID: 17278112; PMID: 27811859	0	NA
LAMA2	NM_000426.3:c.1084A>T p.Arg362Ter	1	1	Congenital muscular dystrophy (607855), Muscular dystrophy, limb-girdle (618138)	Highly penetrant	PMID: 32904964	0	NA
POLG	NM_002693.2:c.2890C>T p.Arg964Cys	2	0	Autosomal recessive mitochondrial DNA depletion syndrome (Alpers type (203700) , MNGIE type(613662)), Autosomal recessive mitochondrial recessive ataxia syndrome (includes SANDO, SCAE) (607459), Autosomal recessive external opthalmoplegia (PEO) (258450), autosomal dominant progressive external opthalmoplegia (PEO) (157640)	Mild	PMID: 29992832	0	NA
SLC26A4	NM_000441.2:c.919-2A>G	1	0	Autosomal recessive deafness (600791), Pendred syndrome (274600)	Highly penetrant	PMID: 10874637, 11502831	1	NA
SRD5A2	NM_000348.4:c.680G>A p.Arg227Gln	2	0	Pseudovaginal perineoscrotal hypospadias (264600)	Mild	PMID: 32713132	0	NA
TUBGCP6	NM_020461.4:c.2665_2666insA	1	0	Autosomal recessive microcephaly and chorioretinopathy (251270)	Highly penetrant	PMID: 25344692	0	NA
Total (n)		102					38	1
Autosomal dominant heterozygotes
Gene		Heterozygotes (n)	Heterozgyotes in gnomAD4.0	Condition (Phenotype MIM number)	Expected phenotype	Evidence for variant impact	Medical history available (n)	Relevant medical history (n)
ATP1A3	NM_152296.5:c.1072G>C p.Gly358Arg	1	0	CAPOS syndrome (601338), Alternating hemiplegia of childhood 2 (614820), Dystonia-12 (128235)	Highly penetrant	PMID: 26410222; PMID: 34612482; PMID: 25656163; PMID: 30713930	1	0
BEST1	NM_004183.4:c.1550C>G p.Ser517Ter	1	18	Vitelliform macular dystrophy (153700), Vitreoretinochoroidopathy (1932200), Retinitis pigmentosa (613194), Autosomal recessive bestrophinopathy (611809)	Mild	PMID: 38155675	1	0
	NM_004183.4:c.1550_1551del p.Ser517Ter	1	0	Vitelliform macular dystrophy (153700), Vitreoretinochoroidopathy (1932200), Retinitis pigmentosa (613194), Autosomal recessive bestrophinopathy (611809)	Mild	PMID: 38155675	1	0
CAV3	NM_033337.3:c.277G>A p.Ala93Thr	8	160	Familial hypertrophic cardiomyopathy (1926000), Long QT syndrome (611818), Elevated serum creatine phosphokinase (123320), Distal myopathy (Tateyama type) (614321), Rippling muscle disease (606072)	Mild	PMID: 19697367; PMID: 32419263	1	0
COL1A1	NM_000088.4:c.2877del p.Val960TrpfsTer148	1	0	Osteogenesis imperfecta, type I (166200), Osteogenesis imperfecta, type II (166210), Osteogenesis imperfecta, type III (259420), Osteogenesis imperfecta, type IV (166220), Caffey disease (114000), Ehlers-Danlos syndrome, arthrochalasia type, 1 (130060)	Mild	PMID: 31414283	0	NA
	NM_000088.4:c.2450del p.Pro817LeufsTer291	2	10	Osteogenesis imperfecta, type I (166200), Osteogenesis imperfecta, type II (166210), Osteogenesis imperfecta, type III (259420), Osteogenesis imperfecta, type IV (166220), Caffey disease (114000), Ehlers-Danlos syndrome, arthrochalasia type, 1 (130060)	Mild	PMID: 27059743, 27748872	0	NA
COL2A1	NM_001844.5:c.85+1G>A	1	0	Ehlers-Danlos syndrome 2(619120), cardiac valvular type (225320), Ehlers-Danlos syndrome, arthrochalasia type, 2 (617821), Osteogenesis imperfecta, type II (166210), Osteogenesis imperfecta, type III (259420), Osteogenesis imperfecta, type IV (166220)	Highly penetrant	PMID: 16199547; PMID: 20179744	0	NA
ELN	NM_000501.4:c.134-1G>T	1	0	Autosomal dominant cutis laxa (123700), Supravalvar aortic stenosis (185500)	Mild	PMID: 16199547; PMID: 11175284	0	NA
	NM_000501.4:c.686-2A>G	8	8	Autosomal dominant cutis laxa (123700), Supravalvar aortic stenosis (185500)	Mild	PMID: 16199547; PMID: 11175284	1	0
FLCN	NM_144997.7:c.1432+1G>T	1	0	Birt-Hogg-Dube syndrome, (135150); Pneumothorax, primary spontaneous, (173600);	Variable penetrance	PMID: 32257251	0	NA
	NM_144997.7:c.1579_1580insA p.Arg527GlnfsTer75	1	2			PMID: 22441547; PMID: 24346394	0	NA
FZD4	NM_012193.4:c.678G>A p.Trp226Ter	1		Exudative vitreoretinopathy 1, (133780); Retinopathy of prematurity (133780)	Highly penetrant	PMID: 21097938	0	NA
GLMN	NM_053274.3:c.1055_1059del p.Leu352ProfsTer25	1	0	Glomuvenous malformations (138000)	Variable penetrance	PMID: 23801931	0	NA
	NM_053274.3:c.844_847del p.Leu282GlnfsTer10	1	35	Glomuvenous malformations (138000)	Variable penetrance	PMID: 11845407	1	NA
	NM_053274.3:c.632+1G>T	1	9	Glomuvenous malformations (138000)	Variable penetrance	PMID: 23801931	2	NA
	NM_053274.3:c.235G>T p.Glu79Ter	1	0	Glomuvenous malformations (138000)	Variable penetrance	PMID: 23801931	3	NA
KMT2A	NM_001197104.2:c.1470_1471del p.Gln491GlyfsTer3	1	0	Wiedemann-Steiner syndrome (605130)	Highly penetrant	PMID: 31044088	1	0
KRT6A	NM_005554.4:c.1090C>T p.Gln364Ter	1	0	Pachyonychia congenita (615726)	Mild	PMID: 24611874	1	No
	NM_005554.4:c.1078-1G>A	1	0	Pachyonychia congenita (615726)	Mild	PMID: 24611874
MPZ	NM_000530.8:c.103G>A p.Asp35Asn	1	3	Charcot-Marie-Tooth disease, type 2J (607736), Charcot-Marie-Tooth disease, type 1B (118200), Dejerine-Sottas disease (145900), Hypomyelinating neuropathy, congenital, 2 (618184), Charcot-Marie-Tooth disease, dominant intermediate D (607791), Roussy-Levy syndrome (180800), Charcot-Marie-Tooth disease, type 2I (607677)	Adult onset	PMID: 20385006	0	NA
MYCN	NM_005378.6:c.1117C>T p.Arg373Ter	1	0	Feingold syndrome 1, 164280 (3), Autosomal dominant	Mild	PMID: 18470948	0	NA
NOTCH2	NM_024408.4:c.193C>T p.Arg65Ter	2	0	Hajdu-Cheney syndrome, (102500) (3); Alagille syndrome 2, (610205)	Mild	PMID: 22209762	0	NA
NR5A1	NM_004959.5:c.991-1G>A	1	0	Adrenocortical insufficiency (612964), 46, XX sex reversal 4 (617480), Premature ovarian failure 7 (612964), Spermatogenic failure 8 (613957), 46XY sex reversal 3 (612965)	Variable penetrance	PMID: 33296094	0	NA
PITX2	NM_000325.6:c.29T>A p.Leu10Ter	1	0	Axenfeld-Rieger syndrome, type 1, (180500); Ring dermoid of cornea, (180550); Anterior segment dysgenesis 4, (137600)	Mild	PMID: 20881294	0	NA
PTPN11	NM_002834.5:c.188A>G p.Tyr63Cys	1	12	Noonan Syndrome (163950)	Mild	PMID: 31219622	0	NA
RANBP2	NM_006267.5:c.1067_1068insTTTTTTT	1	0	Encephalopathy, acute, infection-induced (608033)	Variable penetrance	PMID: 24641098
RASA1	NM_002890.3:c.2498C>A p.Ser833Ter	1	0	Capillary malformation-arteriovenous malformation 1, (608354)	Variable penetrance	PMID: 24038909	0	NA
RUNX2	NM_001024630.4:c.194_195insG	1		Cleidocranial dysplasia, forme fruste, with brachydactyly (119600), Metaphyseal dysplasia with maxillary hypoplasia with or without brachydactyly (156510)	Mild	PMID: 11857736	0	NA
SGCE	NM_003919.3:c.28G>T p.Gly10Ter	1	0	Myoclonus-Dystonia (159900)	Mild	PMID: 20800530	0	NA
SPAST	NM_014946.3:c.1496G>A p.Arg499His	1	1	Spastic paraplegia 4 (182601)	Highly penetrant	PMID: 34753439	0	NA
Total (n)		46					13	0
Xlinked hemizygotes
Gene		Hemizygotes (n)	Hemizgyotes in gnomAD4.0	Condition (Phenotype MIM number)	Expected phenotype	Evidence for variant impact	Medical history available (n)	Relevant medical history (n)
GLA	NM_000169.3:c.640-801G>A	2	1	Fabry disease (301500)	Adult onset	PMID: 32246049	0	NA
Total (n)		2					0	0
