# Supplementary material for: Unexpected genotypes associated with severe paediatric conditions identified in a healthy population cohort.
Source: Research Square preprint supplement (doi:10.21203/rs.3.rs-6532096/v1), 2025-05-15
Supplement: Supplementary file 7 [file e88a80fd411a03eaab9289e2.xlsx]

## Sheet: SuppleTable 2 _Gene Lists
Supplementary Table 2. Genes associated with severe paediatric conditions selected for analysis (n=1619). Genes with potential clonal haematopoesis and homology regions are indicated for further consideration.
Severe paediatric conditions
Gene symbol	Tarailo-Gravac et al., 2017	Kirk et al.,2021	Babyseq	Babyscreen	Clonal haematopoeisis	Homology regions
AAAS		x	x	x
AARS2	x	x
ABAT	x	x
ABCA12	x	x	x
ABCA3		x	x
ABCA4	x	x	x
ABCB11		x	x
ABCB4		x	x
ABCB7	x	x
ABCC6	x	x	x	x
ABCC8	x	x	x	x
ABCD1	x		x	x
ABHD12		x
ABHD5	x	x
ACAD9	x		x	x
ACADL	x
ACADM	x		x	x
ACADS	x
ACADSB	x	x
ACADVL	x	x	x	x
ACAT1	x	x	x	x
ACE		x	x
ACO2	x	x
ACOX1		x	x
ACSF3	x	x	x
ACTA1	x	x	x
ADA		x	x	x
ADA2	x			x
ADAMTS10	x	x
ADAMTS13	x	x	x	x
ADAMTS2	x	x
ADAMTSL2		x	x			x
ADAR		x	x
ADAT3		x
ADGRG1		x
ADGRV1		x		x
ADSL	x	x
AGA		x	x
AGBL5		x
AGK	x	x
AGL	x		x	x
AGPAT2	x	x
AGPS	x	x
AGRN	x	x	x	x
AGT	x
AGTR1	x	x
AGXT	x	x	x	x
AHI1		x	x
AIFM1	x	x	x
AIMP1		x
AIPL1	x
AIRE		x	x	x
AK2		x		x
AKR1D1	x		x	x
AKT3		x
ALAD	x	x
ALDH18A1		x	x
ALDH1A3	x	x
ALDH3A2	x	x	x
ALDH5A1	x	x	x
ALDH7A1	x	x		x
ALDOB	x	x	x	x
ALG1	x	x	x
ALG11	x	x
ALG12	x		x
ALG13	x	x
ALG2	x	x
ALG3	x	x	x
ALG6	x	x	x
ALG8	x	x	x
ALG9	x	x
ALMS1	x	x	x
ALOX12B	x	x	x
ALOXE3	x	x	x
ALPL	x	x	x	x
ALS2	x		x
ALX1	x
ALX3	x
AMACR	x			x
AMER1(FAM123B)		x
AMPD2	x	x
AMT	x		x
ANKH		x	x
ANKS6	x
ANO10	x		x
ANO3		x
ANTXR1	x	x
ANTXR2		x	x
AP1S2	x
AP3B1		x	x	x
AP3B2		x
AP4B1		x
AP4M1		x
AP4S1	x	x
APTX	x	x	x
AQP2	x			x
AR	x	x	x		x
ARFGEF2	x	x	x
ARG1	x	x	x	x
ARHGEF9	x	x
ARL13B	x	x
ARL6		x
ARMC4		x	x
ARPC1B	x	x		x
ARSA	x	x	x	x
ARSB	x		x	x
ARSE		x
ARV1	x	x
ARX		x	x
ASAH1		x
ASCC1	x	x
ASL		x	x	x
ASNS	x	x
ASPA	x	x	x
ASPM	x	x
ASS1	x		x	x
ASXL1		x			x
ATAD1	x	x
ATCAY		x
ATF6	x
ATIC	x	x
ATM		x	x		x
ATOH7		x
ATP13A2	x
ATP1A3	x
ATP2B3		x
ATP6AP1	x
ATP6AP2	x	x
ATP6V0A2		x	x
ATP6V0A4		x		x
ATP6V1B1		x	x	x
ATP7A		x	x	x
ATP8A2	x	x
ATP8B1	x	x	x
ATR	x	x
ATRX	x	x	x
AUH	x		x
AVPR2		x	x	x
B3GALNT2		x
B3GALT6	x
B3GALTL		x	x
B3GAT3		x
B3GLCT		x
B4GALNT1	x
B4GALT1		x
B4GALT7	x
BAAT	x		x
BAG3	x	x	x
BBS1	x	x	x
BBS10	x	x	x
BBS12	x	x	x
BBS2	x	x	x
BBS4	x	x	x
BBS5	x	x	x
BBS7	x	x	x
BBS9	x	x	x
BCKDHA	x	x	x	x
BCKDHB		x	x	x
BCKDK	x			x
BCOR	x	x			x
BCS1L	x		x
BEST1		x
BGN		x
BIN1	x	x	x
BLM	x		x
BLOC1S3		x
BMPER		x
BMPR1B		x
BOLA3	x
BRAF		x	x		x
BRAT1		x
BRF1	x
BRIP1		x		x
BRWD3	x	x
BSCL2		x	x	x
BSND	x	x	x	x
BTK	x	x	x	x
BUB1B	x
C10orf2		x	x
C12orf57		x
C12orf65		x
C19orf12		x
C1QA		x
C1QB		x
C1QC		x
C2CD3		x
C3		x		x
C5	x			x
C5orf42		x
C6		x		x
C7		x		x
C8B		x		x
C8orf37		x
CA2	x		x	x
CA5A	x			x
CABC1		x
CABP4	x
CACNB4		x
CANT1		x
CAPN3		x	x
CARD11		x		x
CARD9		x
CARS2	x	x
CASK	x		x
CASP10		x
CASR	x			x
CAV3		x	x
CAVIN1	x			x
CBL	x	x	x		x
CBS		x	x	x
CC2D1A	x	x
CC2D2A		x	x
CCBE1		x
CCDC103		x
CCDC114		x
CCDC115		x
CCDC39		x	x
CCDC40	x	x	x
CCDC8	x	x
CCDC88C		x
CCN6		x
CCNO	x
CD19		x		x
CD27		x		x
CD3D		x		x
CD40	x	x		x
CD40LG		x	x	x
CD55		x		x
CD81	x
CD96	x
CDAN1		x	x
CDC45		x
CDH11	x	x
CDH23		x	x	x
CDH3		x
CDK10	x	x
CDK5RAP2	x
CDKL5		x	x
CDT1	x	x
CENPJ		x
CEP120	x	x
CEP152	x	x	x
CEP290		x	x
CEP41		x
CEP78		x
CERS3		x
CFAP410		x
CFD	x	x		x
CFH		x		x
CFI	x	x		x
CFL2		x	x
CFP	x	x	x	x
CFTR	x	x	x	x
CHAT	x		x	x
CHD7		x	x
CHKB		x	x
CHM	x	x	x
CHRNA1	x		x	x
CHRNB1	x	x		x
CHRND	x	x	x	x
CHRNE	x	x	x	x
CHRNG	x	x	x
CHST14	x	x
CHST3		x
CHSY1		x
CIB2		x		x
CIITA		x		x
CISD2		x
CIT		x
CKAP2L	x	x
CLCF1	x
CLCN1	x	x
CLCN2		x
CLCN4		x
CLCN5		x	x
CLCN7		x		x
CLCNKB	x	x
CLDN1		x
CLDN10	x	x
CLDN19		x	x
CLMP	x	x
CLN3	x	x	x
CLN5	x	x	x
CLN6	x	x	x
CLN8	x		x
CLN9		x
CLP1	x	x
CLPB		x
CLPP	x	x		x
CLRN1		x	x
CNGA3	x	x
CNGB3		x	x
CNNM4		x
CNTNAP1		x
CNTNAP2		x
COA8	x
COG1	x
COG4	x
COG5	x	x
COG6	x	x
COG7	x
COG8		x
COL11A1	x	x	x	x
COL11A2	x	x	x	x
COL17A1		x	x
COL18A1	x
COL1A1	x		x	x
COL1A2		x	x	x
COL27A1	x	x
COL2A1	x		x	x
COL4A1	x	x
COL4A3		x	x	x
COL4A4		x	x	x
COL4A5	x	x	x	x
COL6A1		x	x
COL6A2		x	x
COL6A3	x	x	x
COL7A1	x		x
COL9A1	x			x
COL9A2	x			x
COL9A3		x		x
COLEC11	x	x
COLQ	x		x	x
COMP	x	x
COQ2		x		x
COQ4		x		x
COQ6		x		x
COQ8A		x		x
COQ8B	x
CORO1A	x	x		x		x
COX10		x
COX15		x
COX20		x
CPLANE1	x	x
CPS1	x	x	x	x
CPT1A	x	x	x	x
CPT2		x	x	x
CRB1		x
CRB2	x
CREBBP	x	x	x		x
CRLF1		x	x
CRPPA	x	x
CRTAP	x		x	x
CRYAB	x		x
CSE(DYT9)	x
CSF1R		x
CSPP1	x	x
CSTB	x	x	x
CTC1	x		x
CTDP1	x	x
CTNS		x	x	x
CTPS1		x		x
CTSA		x
CTSC	x	x
CTSD		x	x
CTSF	x	x
CTSK		x	x
CUL4B	x	x
CUL7		x	x
CWC27		x
CYB5R3	x	x
CYBA	x	x	x	x
CYBB	x		x	x
CYC1	x	x
CYP11A1		x	x	x
CYP11B2	x	x		x
CYP17A1	x	x		x
CYP1B1	x
CYP21A2	x	x	x	x
CYP27A1	x		x	x
CYP27B1		x	x	x
CYP2U1	x	x
CYP4F22		x	x
CYP7B1	x	x		x
D2HGDH		x	x
DARS1	x	x
DARS2	x
DBH	x	x
DBT		x	x	x
DCAF17	x	x
DCDC2		x
DCHS1	x	x
DCLRE1C	x		x	x
DCN	x	x
DCX	x		x
DDB2	x	x	x
DDC		x	x	x
DDHD2		x
DDR2		x
DDX11		x
DDX59		x
DENND5A	x
DFNB31		x
DGAT1		x		x
DGKE	x	x
DGUOK	x	x	x
DHCR24	x	x
DHCR7	x	x	x	x
DHDDS	x
DHH		x
DHODH		x
DIS3L2	x	x
DKC1	x		x
DLAT	x	x		x
DLD		x	x
DLG3	x	x
DLL3	x	x	x
DMD	x		x
DMP1		x	x	x
DNAAF1		x	x
DNAAF3		x
DNAAF4		x
DNAAF5	x	x
DNAH11	x	x	x
DNAH5		x	x
DNAI1		x	x
DNAI2		x
DNAJC12	x	x		x
DNAJC19		x
DNAJC21	x			x
DNAJC5		x
DNAJC6	x
DNAL1	x
DNM1L	x	x
DNMT3B		x	x	x	x
DOCK2		x		x
DOCK6	x	x
DOCK8	x	x	x	x
DOK7	x	x	x	x
DOLK		x
DONSON	x	x
DPAGT1		x	x	x
DPH1	x
DPM1	x
DPM3	x
DPYD	x
DST		x
DSTYK	x
DTNBP1		x
DYM	x	x
DYNC2H1		x
DYNC2LI1	x
DYRK1A		x
DYSF		x	x
EARS2	x
EBP		x
ECEL1		x
ECHS1	x	x		x
EDA	x	x	x
EDAR	x		x
EDARADD	x		x
EDN3	x			x
EDNRB	x	x		x
EFEMP2	x	x
EFNB1	x
EHMT1	x	x
EIF2AK3		x	x	x
EIF2AK4	x	x
EIF2B1	x	x
EIF2B2	x	x
EIF2B3	x	x
EIF2B4	x	x
EIF2B5		x
EIF2S3		x
ELAC2	x
ELANE	x		x	x
ELN		x	x
ELP1		x
ELP2		x
EMD		x	x
EMG1		x
EML1	x	x
ENPP1		x	x	x
EOGT	x
EP300		x
EPCAM	x	x
EPG5	x
EPHX1	x	x
EPM2A	x	x	x
ERBB3	x
ERCC1	x	x
ERCC2	x		x		x
ERCC3	x	x
ERCC4	x	x		x
ERCC5	x	x	x
ERCC6		x	x
ERCC6L2	x	x
ERCC8	x	x	x
ESCO2	x	x	x
ETFA	x	x	x	x
ETFB	x	x	x	x
ETFDH	x	x	x	x
ETHE1	x	x	x	x
EVC	x	x	x
EVC2	x	x	x
EXOSC3		x
EXOSC8		x
EXTL3	x
EYA1	x		x
F11		x	x
F2	x	x	x
F5		x
F7		x		x
F8	x	x	x
F9	x	x	x	x
FA2H	x	x
FAH	x	x	x	x
FAM126A	x		x
FAM134B		x
FAM161A	x	x	x
FAM20C	x	x	x
FANCA	x	x	x	x
FANCB	x	x	x	x
FANCC	x	x	x	x
FANCD2	x	x	x	x
FANCE	x	x
FANCF	x	x
FANCG	x	x	x	x
FANCI	x	x	x	x
FANCL	x
FANCM		x
FARS2	x
FASLG		x
FAT4	x	x
FBLN5	x		x
FBN2		x	x
FBP1		x		x
FBXL4		x
FBXO7	x	x
FERMT1		x
FERMT3	x	x		x
FGA	x	x	x	x
FGB	x	x	x	x
FGD4	x		x
FGF10	x
FGF3	x		x	x
FGF8	x
FGFR1	x		x
FGFR2	x		x
FGFR3	x	x	x	x
FGG	x	x	x	x
FH		x	x	x
FHL1		x	x
FIG4		x
FKBP10		x		x
FKBP14	x	x
FKRP	x	x	x
FKTN		x	x
FLAD1	x			x
FLCN	x	x	x
FLNA	x	x	x
FLNB		x
FLVCR1		x
FLVCR2	x
FMO3		x
FMR1		x
FOLR1	x			x
FOXC1		x	x
FOXE3	x
FOXL2	x	x
FOXN1	x	x		x
FOXP3		x	x	x
FOXRED1	x	x
FRAS1	x	x	x
FREM1	x	x
FREM2	x
FRMD7		x
FRRS1L		x
FTCD		x
FTO		x
FTSJ1	x	x
FUCA1		x	x	x
FYCO1	x
FZD4	x	x
G6PC	x	x	x	x
G6PC3	x		x	x
G6PD	x	x	x	x
GALC	x		x	x
GALE	x			x
GALK1	x	x	x	x
GALNS	x		x	x
GALT	x	x	x	x
GAMT	x	x		x
GAN	x		x
GARS		x
GAS8	x	x
GATM	x	x		x
GBA		x	x	x
GBA2	x	x
GBE1	x	x	x
GCDH		x	x	x
GCH1	x		x	x
GCK	x		x	x
GCSH		x
GDAP1		x	x
GDF1		x
GDF5		x
GDI1	x
GFAP	x		x
GFI1	x	x		x
GFM1	x	x	x
GFPT1		x	x
GHR	x	x		x
GJA1	x		x
GJB2	x		x	x
GJB6	x	x
GJC2		x	x
GK		x
GLA	x	x	x	x
GLB1	x	x	x
GLDC		x	x
GLDN	x	x
GLE1	x
GLI3	x		x
GLIS2		x
GLIS3	x			x
GLMN	x
GLRA1	x		x	x
GLRB	x
GLUD1		x	x	x
GLYCTK		x
GM2A		x
GMPPA		x
GMPPB	x
GNAS		x	x	x	x
GNAT2		x
GNB5		x
GNE	x	x	x
GNPAT	x	x
GNPTAB	x	x	x
GNPTG	x		x
GNRH1	x
GNRHR	x	x
GNS	x	x	x
GORAB	x	x
GOSR2	x
GP1BA	x
GP1BB	x
GP9		x
GPAA1	x	x
GPC3	x		x
GPC4		x
GPC6	x	x
GPHN	x	x
GPR143		x	x
GPR179	x
GPR56	x		x
GPR98		x	x
GPSM2		x	x
GPT2	x
GRHPR	x		x	x
GRIP1		x
GRM1	x	x
GSS	x	x	x
GTF2H5		x
GTPBP3		x
GUCY1A1		x
GUCY2C	x	x
GUCY2D	x	x
GUSB		x	x	x
GYS2	x		x	x
H6PD		x
HACE1	x	x
HADH	x	x	x	x
HADHA	x	x	x	x
HADHB	x		x	x
HAL		x
HAMP	x	x
HAX1	x			x
HBA1	x		x
HBA2	x	x	x
HBB	x		x	x
HCCS		x
HCFC1	x	x
HEPACAM		x
HERC2	x	x				x
HES7	x	x
HESX1	x	x		x
HEXA	x	x	x
HEXB	x	x	x
HGSNAT	x	x	x
HIBCH		x		x
HINT1		x	x
HJV		x
HK1	x	x		x
HLCS	x	x	x	x
HMGCL		x	x	x
HMGCS2		x
HOXA1	x
HOXA13		x
HPD		x
HPGD	x	x
HPRT1	x	x	x
HPS1	x	x	x
HPS3	x	x	x
HPS4	x	x	x
HPS5	x	x	x
HPS6		x
HPSE2	x
HRAS	x	x	x
HSD17B10	x		x
HSD17B3	x	x	x
HSD17B4	x	x	x
HSD3B2		x		x
HSD3B7		x	x	x
HSPD1	x	x
HSPG2		x	x
HTRA2		x
HUWE1		x
HYDIN	x	x				x
HYLS1		x
IARS1		x
IARS2		x
IBA57	x	x
ICOS	x	x		x
IDS	x	x	x	x
IDUA		x	x	x
IER3IP1		x
IFNGR1		x
IFNGR2		x
IFT122		x
IFT140		x
IFT172	x	x
IFT80	x
IGBP1	x
IGF1		x		x
IGF1R		x
IGFBP7		x
IGHM	x	x		x
IGHMBP2	x		x
IKBKAP		x	x
IKBKB	x	x		x
IKBKG		x	x			x
IL10RA		x	x	x
IL11RA		x
IL12RB1		x
IL17RA		x
IL1RAPL1		x
IL1RN	x			x
IL2RA	x	x		x
IL2RG	x	x	x	x
IL7R		x		x
IMPG2	x	x
INPP5E		x
INPP5K		x
INPPL1	x	x
INSR	x	x	x
INVS	x	x	x
IQCB1		x	x
IQSEC2		x
ISCA2	x
ISCU		x
ITCH	x	x
ITGA6		x
ITGB2	x	x		x
ITGB4		x	x
ITK		x		x
ITPR1	x	x
IVD	x		x	x
JAG1		x	x
JAGN1	x	x		x
JAK3		x	x	x
JAM3		x
JUP	x		x
KAL1 (ANOS1)	x
KANK1		x
KATNB1	x
KBTBD13	x	x	x
KCNE1	x	x	x
KCNJ1		x	x	x
KCNJ10	x	x
KCNJ11	x		x	x
KCNJ13	x
KCNQ2		x
KCNV2	x	x
KCTD7		x	x
KDM5C		x			x
KIAA0586		x
KIAA1109	x
KIAA1279		x
KIF14	x	x
KIF1A		x
KIF1C	x
KIF21A	x	x	x
KIF7		x
KIFBP	x
KISS1R		x
KLHL40		x	x
KLHL41		x	x
KLHL7	x
KMT2A		x
KNL1		x
KPTN	x
KRAS		x	x		x
KRT10	x	x
KRT14	x		x
KRT16	x		x
KRT17	x		x
KRT18	x	x
KRT5	x		x
KRT6A	x		x
KRT6B	x
KRT6C	x	x
KRT8		x
KRT85		x
KY	x	x
L1CAM		x	x
L2HGDH		x
LAMA1	x	x
LAMA2	x	x	x	x
LAMA3		x	x
LAMB1	x	x
LAMB2	x	x	x
LAMB3	x	x	x
LAMC2		x	x
LAMC3	x
LAMP2	x		x
LARGE		x	x
LARGE1		x
LARP7		x
LARS1		x
LARS2		x
LAT	x	x		x
LBR	x	x	x
LCA5		x
LCAT		x
LDHA		x
LDHB		x
LDLRAP1		x
LEP	x			x
LEPRE1	x
LFNG		x
LGI4	x	x
LHX3	x		x	x
LHX4		x		x
LIAS	x	x
LIFR		x	x
LIG4		x	x	x
LINS1		x
LIPA		x	x	x
LIPC		x
LIPT1		x
LMAN1		x
LMBR1	x	x
LMBRD1		x	x	x
LMOD3	x		x
LMX1B		x	x
LONP1		x
LPIN1	x	x
LPIN2	x	x
LPL		x		x
LRAT		x
LRBA		x		x
LRIG2		x
LRMDA	x	x
LRP2		x	x
LRP4	x	x	x
LRP5	x	x	x	x
LRPPRC		x	x
LRRC6		x	x
LRSAM1	x		x
LTBP2		x
LTBP3	x	x
LTBP4		x	x
LYRM7	x	x
LYST		x	x	x
LZTFL1	x
MAGT1		x		x
MALT1		x		x
MAN1B1	x	x
MAN2B1		x	x	x
MANBA		x
MAOA	x
MAP2K1	x		x
MAP2K2	x		x
MAPK10		x
MAPKBP1		x
MARS1		x
MARS2		x
MASP1	x
MAT1A	x
MATN3		x
MBOAT7		x
MBTPS2		x	x
MC2R	x			x
MCCC1	x		x
MCCC2	x		x
MCEE		x		x
MCFD2		x	x
MCM4	x	x
MCOLN1	x	x	x
MCPH1	x	x	x
MECP2	x	x	x
MED12		x	x
MED17		x
MED23		x
MED25		x
MEGF10		x	x
MEGF8		x
MERTK	x	x
MESP2		x
METTL23	x	x
MFN2		x	x
MFSD2A	x	x
MFSD8	x	x	x
MGAT2		x
MGME1		x
MGP		x	x
MICU1	x	x
MID1		x
MKKS	x	x	x
MKS1	x	x	x
MLC1	x		x
MLL2	x
MLPH		x
MLYCD	x	x	x	x
MMAA	x	x	x	x
MMAB	x	x	x	x
MMACHC	x	x	x	x
MMADHC		x	x	x
MMP2		x
MMP21		x
MMUT	x	x
MOCS1		x	x	x
MOCS2	x		x
MOGS	x
MPDU1		x
MPDZ	x	x
MPI	x	x	x	x
MPL		x	x	x	x
MPLKIP	x	x
MPV17	x	x	x
MPZ		x	x
MRAP		x		x
MRE11	x
MRPS16	x
MRPS22		x
MTFMT		x
MTHFD1	x	x		x
MTHFR	x	x	x
MTM1		x	x
MTMR2	x	x
MTO1	x	x
MTR	x	x	x	x
MTRR	x	x	x	x
MTTP	x	x	x	x
MUSK	x		x	x
MUT	x	x	x	x
MVK	x		x	x
MYCN		x	x		x
MYD88	x			x	x
MYH3	x		x
MYLK		x	x
MYMK	x
MYO15A	x		x	x
MYO5A	x	x			x
MYO5B	x	x
MYO7A	x		x	x
MYOT		x
NAA10	x	x
NAGA	x	x	x
NAGLU	x	x	x	x
NAGS		x	x	x
NALCN		x
NANS		x
NARS2		x
NAXE		x
NBAS	x	x
NBN	x	x	x
NCF1	x	x	x			x
NCF2	x		x	x
NCF4		x		x
NDE1	x	x
NDP		x	x
NDRG1	x
NDST1		x
NDUFA1		x
NDUFA10		x
NDUFA11		x
NDUFAF2		x
NDUFAF5		x
NDUFAF6		x
NDUFS1		x
NDUFS2		x
NDUFS4		x
NDUFS6		x
NDUFS7		x
NDUFS8		x
NDUFV1		x
NDUFV2	x	x
NEB		x	x			x
NECTIN1		x
NEK1	x	x
NEK8	x	x
NEU1	x		x
NEUROG3		x		x
NEXMIF		x
NFU1		x
NGF		x
NGLY1		x	x
NHEJ1	x	x	x	x
NHLRC1	x		x
NHP2		x
NHS	x	x
NIPAL4	x		x	x
NIPBL	x		x
NKX2-1		x	x	x
NKX3-2		x
NKX6-2		x
NLGN4X	x
NLRP3		x
NMNAT1		x
NNT	x			x
NOP10	x
NOTCH2	x	x	x
NPC1	x	x	x	x
NPC2	x	x	x	x
NPHP1	x	x	x
NPHP3	x	x	x
NPHP4	x	x	x
NPHS1	x	x	x
NPHS2		x
NPR2	x	x
NR0B1	x		x	x
NR3C2	x			x
NR5A1	x	x		x
NSDHL		x	x
NSUN2		x
NT5C2	x	x
NTRK1		x	x
NUBPL		x
NUP107	x	x
NUP62		x
NUP93		x
NYX	x	x
OBSL1	x	x	x
OCA2		x	x
OCLN	x	x				x
OCRL	x	x	x
OFD1		x	x
OPA1	x	x	x
OPA3		x	x
OPHN1		x
OPN1LW		x				x
ORAI1		x		x
ORC1		x	x
ORC6		x
OSGEP		x
OSTM1		x	x
OTUD6B		x
P3H1	x			x
PACS1	x	x
PAH	x	x	x	x
PAK3		x	x
PANK2		x	x
PAPSS2	x
PAX2	x
PAX6	x	x	x
PC	x	x	x	x
PCCA	x	x	x	x
PCCB		x	x	x
PCDH12	x	x
PCDH15	x		x	x
PCK1		x
PCNT		x	x
PCSK1		x
PCYT1A		x
PDE6B		x
PDE6C	x	x
PDHA1	x	x	x	x
PDHB	x			x
PDHX	x	x	x	x
PDP1	x			x
PDSS1	x
PDSS2		x
PEPD		x
PET100	x	x
PEX1	x	x	x
PEX10		x	x
PEX11B	x	x
PEX12	x	x	x
PEX13	x		x
PEX14	x	x
PEX16	x
PEX19	x	x
PEX2	x	x	x
PEX26	x	x	x
PEX3	x	x	x
PEX5	x	x	x
PEX6	x	x	x
PEX7		x	x
PFKM		x	x
PGAP1		x
PGAP2		x
PGAP3		x
PGK1		x
PGM1		x		x
PGM3	x	x		x
PHF6		x	x
PHF8		x
PHGDH	x			x
PHKA1	x
PHKA2	x		x	x
PHKB	x		x	x
PHKG2	x		x	x
PHOX2A	x
PHOX2B		x	x
PHYH		x	x
PIEZO2	x	x	x			x
PIGA		x
PIGG		x
PIGL		x
PIGN		x
PIGO		x
PIGT		x
PIGV		x
PIH1D3	x
PIK3CA		x
PIP5K1C	x
PITX2	x	x
PKHD1	x	x	x
PKLR	x		x	x
PKP1	x	x
PLA2G6		x	x
PLAA	x	x
PLCE1	x	x	x
PLEC	x		x
PLEC1	x
PLEKHG5	x	x
PLG	x	x	x	x
PLOD1		x	x
PLOD2	x	x
PLP1		x	x
PLPBP	x	x		x
PMM2	x		x
PMP22		x	x
PMPCA	x
PNKD		x	x
PNKP		x	x
PNP	x			x
PNPLA1		x
PNPLA6	x	x
PNPO		x	x	x
POC1A		x
POLA1	x	x
POLG	x		x
POLH	x	x	x
POLR1C	x
POLR1D		x
POLR3A		x
POLR3B		x
POMC	x	x		x
POMGNT1		x	x
POMGNT2		x
POMK		x
POMP	x	x
POMT1	x	x	x
POMT2		x	x
POP1	x	x
POR	x		x	x
PORCN	x	x	x
POU1F1		x	x	x
PPA2	x	x
PPT1	x	x	x
PQBP1		x	x
PRDM12		x
PRDM5	x
PREPL	x	x
PRF1		x	x	x
PRG4	x	x
PRICKLE1	x
PRICKLE2	x
PRKAR1A	x	x	x	x
PROC	x	x	x
PROP1		x	x	x
PROS1	x	x	x
PRPS1		x
PRUNE1		x
PRX	x	x	x
PSAP	x	x	x
PSAT1		x
PSMB8		x
PSPH	x
PSTPIP1	x			x
PTCH1	x	x	x	x
PTH1R	x		x
PTPN11	x		x
PTPRC		x		x
PTS		x	x	x
PUS1		x
PXDN	x	x
PYCR1		x
PYCR2	x
PYGL		x	x	x
PYROXD1	x
QARS		x
QARS1		x
QDPR		x	x	x
RAB18	x	x
RAB23	x	x	x
RAB27A		x	x	x
RAB33B		x
RAB39B	x	x
RAB3GAP1	x	x	x
RAB3GAP2		x
RAD50	x
RAD51C	x
RAF1	x	x	x
RAG1	x	x	x	x
RAG2	x		x	x
RANBP2	x	x
RAPSN		x	x	x
RARB		x
RARS1	x	x
RARS2	x
RASA1		x	x
RAX		x
RBBP8		x
RBCK1		x
RBM10		x
RCBTB1	x	x
RD3	x	x
RDH12	x	x
RECQL4		x	x
REEP6	x
RELN	x	x
REN		x	x
RETREG1	x	x
RFT1		x
RFX6		x
RFXANK		x		x
RFXAP	x	x		x
RIN2		x
RIPK4		x
RLIM	x	x
RMND1	x	x
RMRP	x	x	x	x
RNASEH2A	x	x	x
RNASEH2B	x	x	x
RNASEH2C		x	x
RNASET2		x
RNU4ATAC		x
ROBO3		x
ROGDI	x	x
ROR2		x	x
RORC		x
RP2		x
RPGR	x	x	x
RPGRIP1	x	x
RPGRIP1L		x	x
RPL10	x	x
RPS6KA3		x	x
RRM2B	x		x
RS1		x	x
RSPH1	x	x
RSPH4A	x	x	x
RSPH9	x	x	x
RTEL1		x
RTN4IP1		x
RTTN	x
RUNX1	x			x
RUNX2		x	x
RXYLT1	x	x
SACS	x		x
SALL1		x	x
SAMD9	x	x		x
SAMHD1		x	x
SAR1B		x		x
SARS2	x
SAX1	x	x
SBDS		x	x	x
SBF2		x
SC5D	x
SC5DL	x	x
SCARB2		x
SCARF2	x
SCN2A	x
SCN4A	x	x	x
SCN9A		x
SCNN1A	x	x	x	x
SCNN1B	x		x	x
SCNN1G	x	x		x
SCO2		x	x
SCYL1	x	x
SDCCAG8		x
SDHAF1		x
SEC23A	x	x
SEC23B		x
SELENON		x
SEMA4A	x
SEPN1		x	x
SEPSECS		x
SERAC1		x
SERPINA1		x
SERPINF1		x		x
SERPINH1		x		x
SETX	x	x	x
SFTPB	x		x
SFTPC	x	x
SGCA	x	x	x
SGCB		x	x
SGCD	x		x
SGCE		x
SGCG		x	x
SGO1		x
SGPL1	x	x		x
SGSH	x	x	x
SH2D1A	x		x	x
SH3BP2		x
SH3PXD2B	x	x
SH3TC2		x	x
SHOX	x
SIGMAR1	x	x
SIL1	x		x
SIX1		x	x
SKIV2L	x	x
SLC12A1		x	x	x
SLC12A5	x	x
SLC12A6		x	x
SLC13A5		x
SLC16A1	x	x
SLC16A2	x	x	x
SLC17A5	x	x	x
SLC19A2	x	x	x	x
SLC19A3	x		x	x
SLC1A3		x
SLC1A4		x
SLC22A5	x		x	x
SLC22A5(OCTN2)		x
SLC24A5		x
SLC25A1	x	x
SLC25A13	x	x	x	x
SLC25A15	x	x	x	x
SLC25A19	x	x		x
SLC25A22		x
SLC25A38		x	x	x
SLC25A46	x	x
SLC26A2		x	x
SLC26A3	x		x	x
SLC26A4		x	x	x
SLC29A3	x
SLC2A1	x	x	x	x
SLC2A10	x	x	x
SLC2A2		x
SLC30A10		x		x
SLC33A1	x
SLC35A1		x
SLC35A3	x
SLC35C1	x	x
SLC35D1	x	x	x
SLC37A4		x	x	x
SLC38A8	x
SLC39A13		x
SLC39A14		x
SLC39A4		x	x	x
SLC39A8	x			x
SLC3A1	x	x	x
SLC45A2	x	x	x
SLC46A1		x	x	x
SLC4A1	x		x	x
SLC4A11		x	x
SLC4A4		x
SLC52A2		x		x
SLC52A3		x		x
SLC5A7		x		x
SLC6A3	x	x
SLC6A5	x	x	x
SLC6A8	x	x	x
SLC7A7		x	x	x
SLC9A3	x	x
SLC9A6	x		x
SLX4	x	x		x
SMARCAL1	x		x
SMC1A	x		x
SMC3	x	x
SMN1	x	x	x	x		x
SMPD1	x	x	x	x
SMS	x	x
SNAP29		x
SNORD118		x
SNX14	x
SOS1	x	x
SOST	x
SOX10	x		x
SOX18	x
SOX2	x
SOX9	x	x	x
SP110		x	x	x
SPAG1		x
SPART	x
SPAST		x
SPATA5	x	x
SPATA7		x
SPG11		x
SPINK5		x	x
SPINT2		x
SPR	x		x	x
SPRED1		x	x
SQSTM1	x
SRD5A2	x	x
SRD5A3		x
SSR4	x	x
ST3GAL5		x
STAMBP	x	x
STAR		x	x	x
STAT1	x			x
STAT3	x		x	x
STAT5B	x	x				x
STIL		x
STIM1	x	x		x
STRA6		x	x
STRADA		x
STUB1	x	x
STX11	x		x	x
STXBP1	x	x	x
STXBP2		x	x	x
SUCLA2	x	x	x
SUCLG1		x	x
SUMF1	x	x
SUOX	x	x	x
SURF1		x	x
SYN1	x
SYNE2		x
SYP	x
TAC3	x
TACO1	x
TACR3		x
TALDO1		x
TANGO2		x		x
TAP1	x	x
TAZ		x	x
TBC1D23		x
TBC1D24		x	x
TBCD	x	x
TBCE		x
TBCK		x
TBX19	x			x
TBX5		x	x
TCAP	x		x
TCF4		x
TCIRG1		x	x	x
TCN2	x			x
TCOF1	x		x
TCTN1	x	x
TCTN2		x
TCTN3	x
TDP1		x
TDRD7		x
TELO2	x
TERC	x		x
TERT	x	x	x
TF	x			x
TFAP2A	x		x
TFAP2B	x		x
TGFB1	x	x
TGM1	x	x	x
TH		x	x	x
THOC2	x	x
TIMM8A	x		x
TINF2	x	x	x
TJP2	x	x
TK2		x	x	x
TMCO1		x
TMEM107		x
TMEM126A	x	x
TMEM138		x
TMEM165	x	x
TMEM216		x
TMEM231	x	x
TMEM237	x	x
TMEM67		x	x
TMEM70		x
TMTC3		x
TNFRSF11A		x		x
TNFRSF11B	x	x	x
TNFRSF13B	x
TNFRSF13C	x
TNFRSF6 (FAS)		x
TNFSF11	x	x	x
TNNT1	x		x
TNXB		x				x
TOE1	x
TP63		x
TPI1	x	x
TPK1	x			x
TPM2	x	x	x
TPM3	x	x	x
TPP1		x	x	x
TRAC		x
TRAPPC11	x
TRAPPC2		x	x
TRAPPC9	x	x
TREX1	x	x	x
TRIM32	x	x	x
TRIM37		x	x
TRIP11		x
TRIT1		x
TRMT10A		x
TRMU		x	x	x
TRNT1		x
TRPM6	x	x		x
TSEN2	x
TSEN34	x	x
TSEN54	x	x	x
TSFM	x	x
TSHB	x		x	x
TSPAN12		x
TSPAN7	x	x
TSPYL1		x
TTC19	x	x
TTC21B		x
TTC37		x	x
TTC7A	x	x	x
TTC8		x
TTI2	x	x
TTPA	x		x	x
TUBA1A		x
TUBA8	x
TUBB3		x
TUBGCP4		x
TUBGCP6		x
TUFM		x
TULP1		x
TUSC3		x
TWNK	x
TXNDC3		x
TXNL4A		x
TYK2		x
TYMP	x	x	x
TYR		x	x
TYRP1	x	x
UBA1		x
UBA5		x
UBE2A		x
UBE2T		x		x
UBE3B	x	x
UBR1		x	x
UFM1		x
UGT1A1	x		x	x
UMOD		x	x
UMPS	x	x		x
UNC13D		x	x	x
UNC80		x
UPB1		x
UPF3B	x
UQCRB		x
UQCRC2	x	x
UQCRQ	x	x
UROS		x	x	x
USB1	x	x
USH1C	x	x	x	x
USH1G	x	x	x	x
USH2A		x	x	x
USP9X		x
VARS1		x
VARS2	x
VDR		x	x	x
VIPAS39		x	x
VKORC1	x	x		x
VLDLR		x	x
VMA21		x
VPS11		x
VPS13A	x	x	x
VPS13B	x	x	x
VPS33B		x	x
VPS37A		x
VPS45		x		x
VPS53		x
VRK1		x
VSX2		x
VWF		x	x
WARS2	x	x
WAS	x		x	x
WDPCP		x
WDR19		x
WDR34		x
WDR35	x
WDR45		x
WDR45B		x
WDR60	x	x
WDR62		x	x
WDR73		x
WDR81	x	x
WFS1		x	x
WHRN	x			x
WISP3		x
WNK1	x			x
WNK4		x		x
WNT1	x
WNT10A		x	x
WNT10B	x
WNT3	x
WNT5A	x	x
WNT7A	x	x
WRAP53	x	x
WRN		x	x
WWOX	x	x
XIAP	x	x		x
XPA	x	x	x	x
XPC		x	x	x
XPNPEP3		x
XRCC4		x
XYLT1		x
XYLT2		x
YARS2	x	x
ZAP70	x	x	x	x
ZBTB24		x
ZC4H2	x	x
ZDHHC9	x
ZEB2	x		x
ZFP57		x
ZFYVE26	x	x
ZIC3	x	x	x
ZMPSTE24		x	x
ZMYND10		x
ZNF335	x	x
ZNF469		x	x
ZNF711		x
ZNHIT3
